# Supplementary material for: Hollow nanocages of vanadium nitride-based electrode material designed for superior charging/discharging stability supercapacitors
Source: Royal Society of Chemistry journal article supplement (doi:10.1039/d3nj03402j), 2023-01-01
Supplement: d3nj03402j1.pdf [file d3nj03402j1.pdf]

**Hollow Nanocages of Vanadium Nitride Based Electrode Material Designed for Superior Charging/Discharging Stability Supercapacitors**

Hao Dang, Lu Wang, Yuanyou Peng, Tianqi He, Fen Ran\*

*State Key Laboratory of Advanced Processing and Recycling of Non-ferrous Metals, School of Materials Science and Engineering, Lanzhou University of Technology, Lanzhou 730050, Gansu, P. R. China*

*\*Corresponding author: [ranfen@lut.edu.cn](mailto:ranfen@lut.edu.cn), or [ranfen@163.com](mailto:ranfen@163.com)*

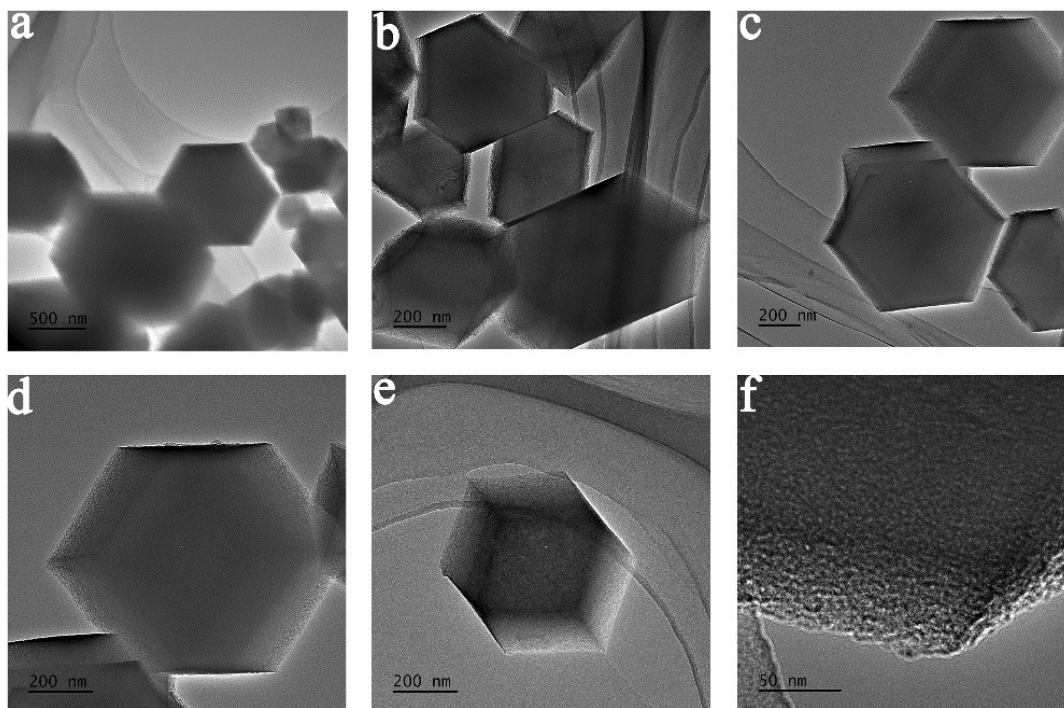

**Figure S1.** a-f) TEM images of ZIF-8.

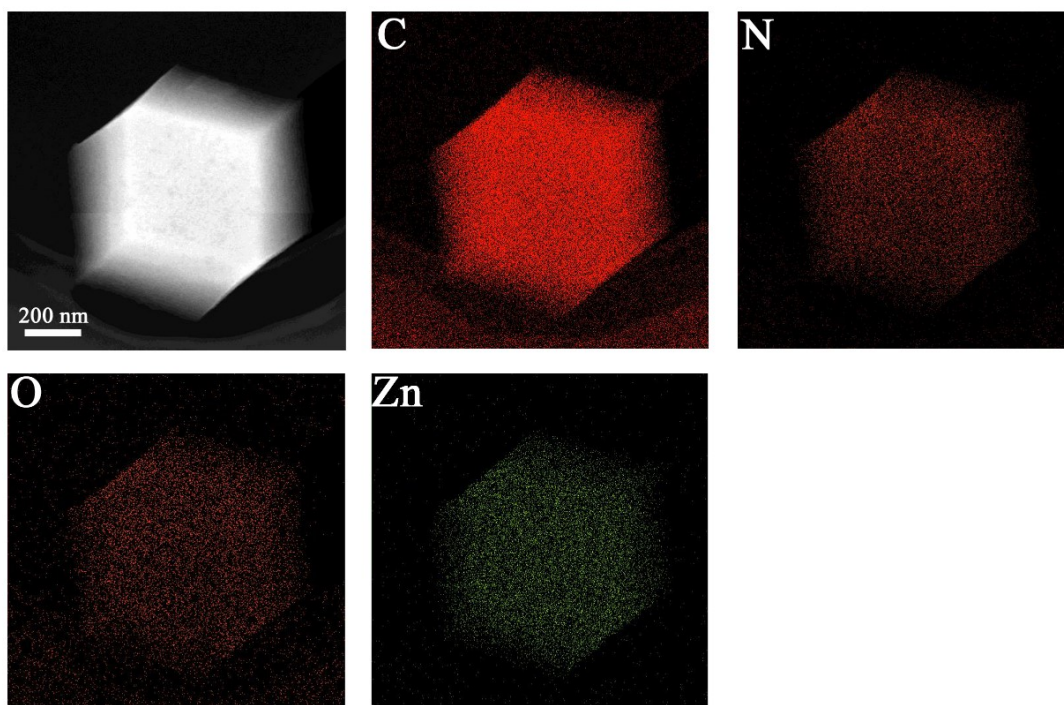

**Figure S2.** TEM-EDS mapping analysis of ZIF-8.

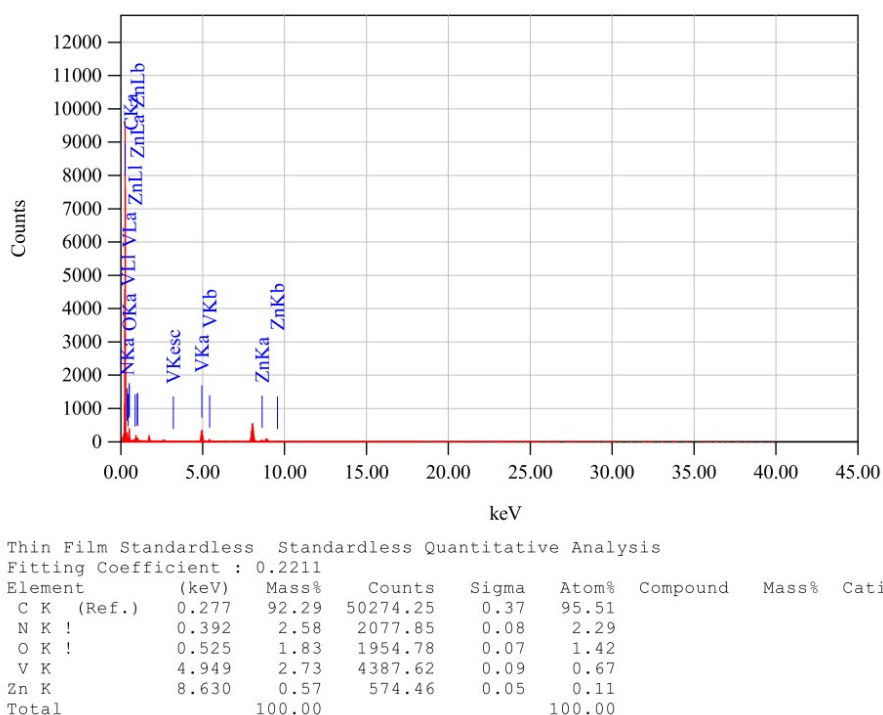

**Figure S3.** TEM-EDS mapping quantity analysis of ZIF-8@VN-CH<sub>3</sub>CH<sub>2</sub>OH.

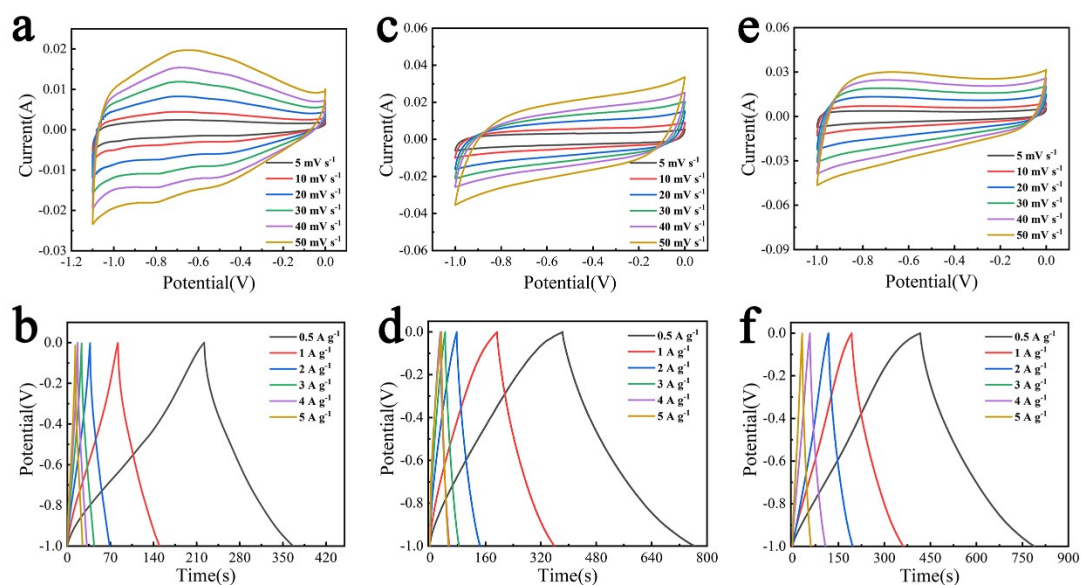

**Figure S4.** CV curves at various scan rates from 5-50  $mV s^{-1}$  of a) VN, c) ZIF-8, and e) ZIF-8@VN- $H_2O$ . GCD curves at different current densities from 0.5-5  $A g^{-1}$  of b) VN, d) ZIF-8, and f) ZIF-8@VN- $H_2O$ .

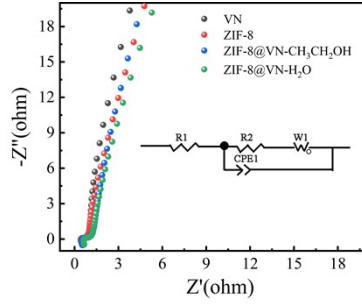

**Figure S5.** EIS impedance modelling of different materials.

**Table S1.** Specific capacitance at different sweep speeds.

| Materials                                   | Scan Rate | 0.005 mV S <sup>-1</sup> | 0.01 mV S <sup>-1</sup> | 0.02 mV S <sup>-1</sup> | 0.03 mV S <sup>-1</sup> | 0.04 mV S <sup>-1</sup> | 0.05 mV S <sup>-1</sup> |
|---------------------------------------------|-----------|--------------------------|-------------------------|-------------------------|-------------------------|-------------------------|-------------------------|
|                                             | VN        |                          | 73.8 F g <sup>-1</sup>  | 71.0 F g <sup>-1</sup>  | 65.9 F g <sup>-1</sup>  | 63.8 F g <sup>-1</sup>  | 62.2 F g <sup>-1</sup>  |
| ZIF-8                                       |           | 143.9 F g <sup>-1</sup>  | 123.4 F g <sup>-1</sup> | 102.9 F g <sup>-1</sup> | 90.6 F g <sup>-1</sup>  | 81.5 F g <sup>-1</sup>  | 84.6 F g <sup>-1</sup>  |
| ZIF-8@VN-CH <sub>3</sub> CH <sub>2</sub> OH |           | 232.4 F g <sup>-1</sup>  | 219.5 F g <sup>-1</sup> | 204.5 F g <sup>-1</sup> | 193.7 F g <sup>-1</sup> | 185.2 F g <sup>-1</sup> | 175.1 F g <sup>-1</sup> |
| ZIF-8@VN-H <sub>2</sub> O                   |           | 161.8 F g <sup>-1</sup>  | 149.4 F g <sup>-1</sup> | 136.8 F g <sup>-1</sup> | 128.8 F g <sup>-1</sup> | 122.8 F g <sup>-1</sup> | 117.8 F g <sup>-1</sup> |

**Table S2** EIS combined with equivalent circuit fitting results.

| Sample                                      | R <sub>s</sub> (Ω) | R <sub>ct</sub> (Ω)  | Z <sub>w</sub> (Ω) |
|---------------------------------------------|--------------------|----------------------|--------------------|
| VN                                          | 0.77               | 1.4×10 <sup>-5</sup> | 3.18               |
| ZIF-8                                       | 0.48               | 0.53                 | 0.03               |
| ZIF-8@VN-CH <sub>3</sub> CH <sub>2</sub> OH | 0.45               | 0.52                 | 0.06               |
| ZIF-8@VN-H <sub>2</sub> O                   | 0.63               | 0.18                 | 0.89               |

**Table S3** Performance comparison of supercapacitor devices assembled with different

*vanadium nitride electrode materials in the literature.*

| Anode materials                             | ASC device                                                       | Vanadium source                 | Power density and energy density                       | Reference |
|---------------------------------------------|------------------------------------------------------------------|---------------------------------|--------------------------------------------------------|-----------|
| ZIF-8@VN-CH <sub>3</sub> CH <sub>2</sub> OH | ZIF-8@VN-CH <sub>3</sub> CH <sub>2</sub> OH//Ni(OH) <sub>2</sub> | VCl <sub>3</sub>                | 3875 W Kg <sup>-1</sup> and 30.9 Wh Kg <sup>-1</sup>   | This work |
| VNQDs/PC                                    | VNQDs/PC//Co(OH) <sub>2</sub>                                    | NH <sub>4</sub> VO <sub>3</sub> | 4231.1 W Kg <sup>-1</sup> and 29.7 Wh Kg <sup>-1</sup> | [1]       |
| VN-MWCNT                                    | VN-MWCNT//MnO <sub>2</sub>                                       | V <sub>2</sub> O <sub>5</sub>   | 316.2 W Kg <sup>-1</sup> and 13.3 Wh Kg <sup>-1</sup>  | [2]       |
| VN/CNP                                      | VN/CNP//VN/CNP                                                   | NH <sub>4</sub> VO <sub>3</sub> | 283.15 W Kg <sup>-1</sup> and 8 Wh Kg <sup>-1</sup>    | [3]       |
| VN/NC                                       | VN/NCS <sub>2</sub> //NiCoS <sub>4</sub>                         | NH <sub>4</sub> VO <sub>3</sub> | 802 W Kg <sup>-1</sup> and 21 Wh Kg <sup>-1</sup>      | [4]       |
| Nano-VN/IPC                                 | Nano-VN/IPC// Ni(OH) <sub>2</sub>                                | NH <sub>4</sub> VO <sub>3</sub> | 3625 W Kg <sup>-1</sup> and 20.2 Wh Kg <sup>-1</sup>   | [5]       |
| VN/NCS                                      | VN/NCS//V <sub>2</sub> O <sub>3</sub> /C                         | NH <sub>4</sub> VO <sub>3</sub> | 801 W Kg <sup>-1</sup> and 19.8 Wh Kg <sup>-1</sup>    | [6]       |

**Reference:**

- [1] Yang Y, Zhao L, Shen K, et al. Ultra-small vanadium nitride quantum dots embedded in porous carbon as high performance electrode materials for capacitive energy storage[J]. *Journal of Power Sources*, 2016, 333: 61-71.
- [2] Ghimbeu C M, Raymundo-Pinero E, Fioux P, et al. Vanadium nitride/carbon nanotube nanocomposites as electrodes for supercapacitors[J]. *Journal of Materials Chemistry*, 2011, 21(35): 13268-13275.
- [3] Yang Y, Shen K, Liu Y, et al. Novel Hybrid Nanoparticles of Vanadium Nitride/Porous Carbon as an Anode Material for Symmetrical Supercapacitor[J]. *Nano-Micro Letters*, 2017, 9(1).
- [4] Jiang X, Lu W, Li Y, et al. An Eco-Friendly Nitrogen Source for the Preparation of Vanadium Nitride/Nitrogen-Doped Carbon Nanocomposites for Supercapacitors[J]. *Chemelectrochem*, 2019, 6(13): 3445-3453.
- [5] Ran F, Wang Z, Yang Y, et al. Nano vanadium nitride incorporated onto interconnected porous carbon via the method of surface-initiated electrochemical mediated ATRP and heat-treatment approach for supercapacitors[J]. *Electrochimica Acta*, 2017, 258: 405-413.
- [6] Jiang X, Lu W, Yu X, et al. Fabrication of a vanadium nitride/N-doped carbon hollow nanosphere composite as an efficient electrode material for asymmetric supercapacitors[J]. *Nanoscale Advances*, 2020, 2(9): 3865-3871.
